# Supplementary material for: Synthesis and controlled curcumin supramolecular complex release from pH-sensitive modified gum-arabic-based hydrogels
Source: Royal Society of Chemistry journal article supplement (doi:10.1039/c5ra14331d), 2015-01-01
Supplement: c5ra14331d1.pdf [file c5ra14331d1.pdf]

## Supplementary Material

### Synthesis and controlled curcumin supramolecular complex release from pH-sensitive modified gum-arabic-based hydrogels

Adriana P. Gerola,<sup>1,2,\*</sup> Danielle C. Silva,<sup>1,2</sup> Sandra Jesus,<sup>3,4</sup> R.A. Carvalho,<sup>5</sup> Adley F. Rubira,<sup>2</sup> Edvani C. Muniz,<sup>2</sup> Olga Borges,<sup>3,4</sup> Artur J. M. Valente<sup>1,\*</sup>

<sup>1</sup> CQC, Department of Chemistry, University of Coimbra, 3004-535 Coimbra, Portugal

<sup>2</sup> Grupo de Materiais Poliméricos e Compósitos, GMPC, Chemistry Department, Maringá State University, 87020-900 Maringá, Paraná, Brazil

<sup>3</sup> Faculty of Pharmacy, University of Coimbra, Coimbra, Portugal

<sup>4</sup> CNC, Center for Neuroscience and Cell Biology, University of Coimbra, 3004-517 Coimbra, Portugal

<sup>5</sup> Department of Life Sciences, University of Coimbra, 3004-535 Coimbra, Portugal

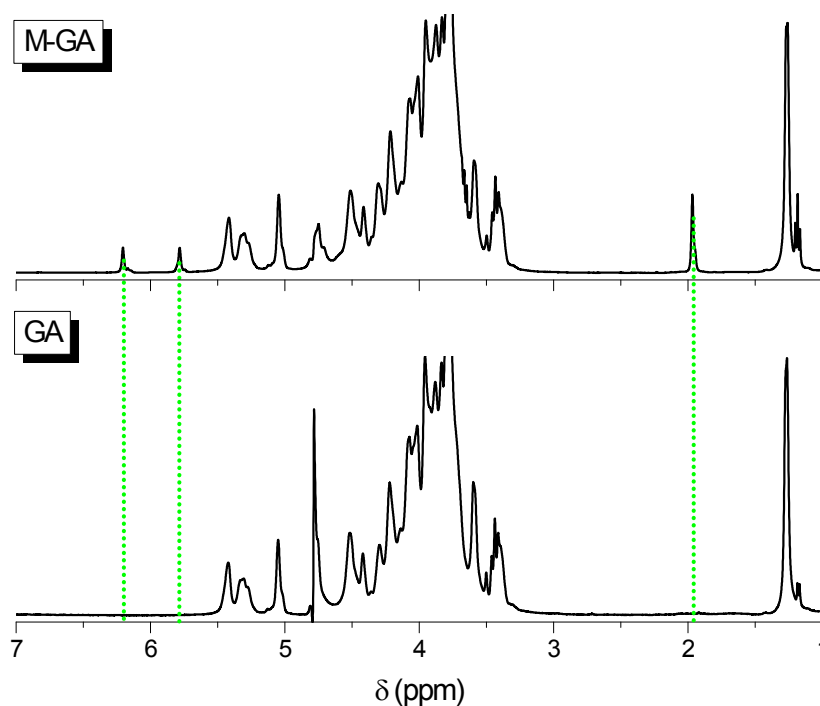

**Figure S1.** <sup>1</sup>H NMR spectra of GA and GAM in D<sub>2</sub>O at 25.0 °C.

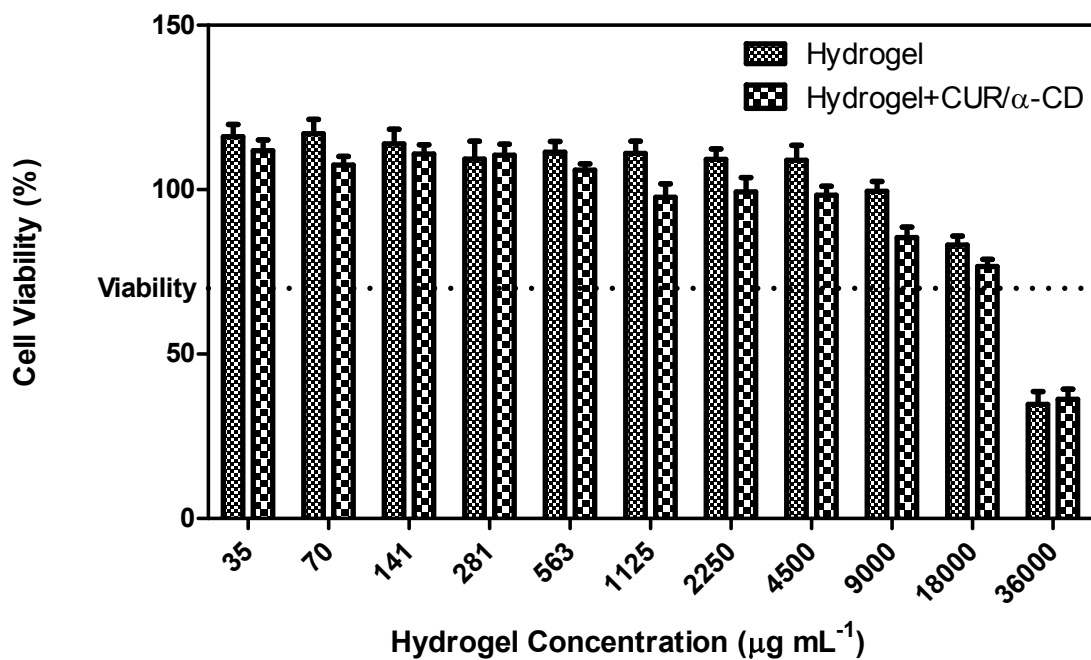

Figure

**Figure S2.** Viability of the Caco-2 cells exposed to hydrogel and hydrogel/CUR/ $\alpha$ -CD for 24 h to various concentrations of hydrogel (0-36000  $\mu\text{g mL}^{-1}$ ). The cell viability was determined by MTT assay. Values represent the mean  $\pm \sigma_M$  of three different experiments in triplicate ( $P < 0.05$ )
